# Supplementary material for: Polymer guided synthesis of Ni(OH)2 with hierarchical structure and their application as the precursor for sensing materials
Source: Royal Society of Chemistry journal article supplement (doi:10.1039/c3ce41614c), 2013-01-01
Supplement: c3ce41614c.pdf [file c3ce41614c.pdf]

Electronic Supplementary Information (ESI) for

# Polymer Guided Synthesis of Ni(OH)<sub>2</sub> with Hierarchical Structure and their Application as the Precursor for Sensing Materials

Guoxing Zhu,<sup>a, b</sup> Yuanjun Liu,<sup>c</sup> Chunyan Xi,<sup>a</sup> Chunlin Bao,<sup>b</sup> Huan Xu,<sup>a</sup> Xiaoping Shen<sup>a, b, \*</sup> and Xiaolu Zhu<sup>a</sup>

<sup>a</sup>School of Chemistry and Chemical Engineering, Jiangsu University, Zhenjiang, 212013, China

<sup>b</sup>School of Materials Science and Engineering, Jiangsu University, Zhenjiang, 212013, China

<sup>c</sup>School of Biology and Chemical Engineering, Jiangsu University of Science and Technology, Zhenjiang, 212013, China

Corresponding author: Xiaoping Shen

Tel: (+)86-511-88791800; Fax: (+)86-511-88791800; E-mail: [xiaopingshen@163.com](mailto:xiaopingshen@163.com)

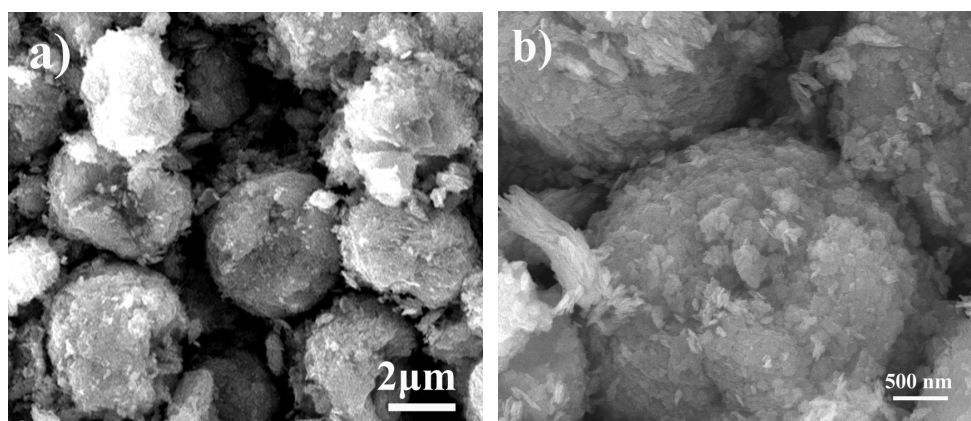

**Figure S1.** SEM images of the NiO product obtained by annealing of Ni(OH)<sub>2</sub>.
